# Supplementary material for: The Influence of Patient–Provider Communication on Cancer Screening
Source: PubMed Central journal article supplement (PMC7786660; doi:10.1177/2374373520924993), 2020-05-11
Supplement: Supplementary_Tables_JPX.pdf [file Supplementary_Tables_JPX.pdf]

**Supplementary Table 1. Sensitivity analysis for breast cancer screenings based on ACS (ages  $\geq 45$  years) and USPSTF (ages  $\geq 50$  years, no mammogram in past 1-2 years) recommendations.**

|                                   | Crude<br>OR (95% CI)                                        | Adjusted<br>OR (95% CI) | Crude<br>OR (95% CI)                                                                                          | Adjusted<br>OR (95% CI) |
|-----------------------------------|-------------------------------------------------------------|-------------------------|---------------------------------------------------------------------------------------------------------------|-------------------------|
| <b>Face-to-Face PPC</b>           | <b>ACS Recommendations<br/>(<math>\geq 45</math> years)</b> |                         | <b>USPSTF Recommendations<br/>(ages <math>&gt; 50</math> years)<br/><i>No mammogram in past 1-2 years</i></b> |                         |
| Not Always (Ref)                  | 1.00                                                        | 1.00                    | 1.00                                                                                                          | 1.00                    |
| Explained so understood           | 1.36 (1.11, 1.66)                                           | 1.30 (1.00, 1.69)       | 1.46 (1.18, 1.80)                                                                                             | 1.44 (1.11, 1.87)       |
| Spent enough time with you        | 1.29 (1.03, 1.61)                                           | 1.36 (1.04, 1.78)       | 1.39 (1.10, 1.75)                                                                                             | 1.49 (1.12, 1.96)       |
| Chance to ask questions           | 1.36 (1.10, 1.68)                                           | 1.50 (1.15, 1.96)       | 1.54 (1.24, 1.92)                                                                                             | 1.74 (1.31, 2.31)       |
| Addressed feelings                | 1.27 (1.02, 1.57)                                           | 1.36 (1.04, 1.77)       | 1.31 (1.05, 1.63)                                                                                             | 1.41 (1.08, 1.86)       |
| Involved you in decisions         | 1.45 (1.16, 1.80)                                           | 1.55 (1.19, 2.02)       | 1.58 (1.27, 1.98)                                                                                             | 1.71 (1.30, 2.26)       |
| Understood what needed to do      | 1.38 (1.11, 1.73)                                           | 1.41 (1.06, 1.87)       | 1.43 (1.14, 1.80)                                                                                             | 1.49 (1.12, 1.99)       |
| Help with Feelings of uncertainty | 1.15 (0.92, 1.42)                                           | 1.21 (0.92, 1.59)       | 1.23 (0.97, 1.55)                                                                                             | 1.34 (1.00, 1.80)       |
| <b>E-mail PPC</b>                 |                                                             |                         |                                                                                                               |                         |
| No (Ref)                          | 1.00                                                        | 1.00                    | 1.00                                                                                                          | 1.00                    |
| Yes                               | 1.03 (0.79, 1.35)                                           | 0.92 (0.70, 1.21)       | 0.96 (0.72, 1.28)                                                                                             | 0.86 (0.64, 1.15)       |

\*All adjusted models accounted for age, race/ethnicity, marital status, highest level of education, insurance status and perceived health status unless otherwise stated. Abbreviations: ACS=American Cancer Society; CI=confidence interval; OR=odds ratio; PPC=patient-provider communication; ref=reference group; USPSTF=United States Preventive Services Task Force.

**Supplementary Table 2. Sensitivity analysis for cervical cancer screening restricted to women who did not receive a Pap test past 1-3 years.\***

|                                   | <b>Crude<br/>OR (95% CI)</b> | <b>Adjusted<br/>OR (95% CI)</b> |
|-----------------------------------|------------------------------|---------------------------------|
| <b>Face-to-Face PPC</b>           |                              |                                 |
| Not Always (Ref)                  | 1.00                         | 1.00                            |
| Explained so understood           | 1.28 (0.96, 1.72)            | 1.36 (0.98, 1.90)               |
| Spent enough time with you        | 1.01 (0.76, 1.33)            | 1.22 (0.89, 1.66)               |
| Chance to ask questions           | 1.50 (1.14, 1.96)            | 1.74 (1.29, 2.37)               |
| Addressed feelings                | 1.33 (1.02, 1.72)            | 1.49 (1.11, 2.00)               |
| Involved you in decisions         | 1.23 (0.92, 1.63)            | 1.33 (0.97, 1.83)               |
| Understood what needed to do      | 1.28 (0.98, 1.67)            | 1.37 (1.00, 1.87)               |
| Help with Feelings of uncertainty | 1.28 (0.96, 1.71)            | 1.54 (1.12, 2.11)               |
| <b>E-mail PPC</b>                 |                              |                                 |
| No (Ref)                          | 1.00                         | 1.00                            |
| Yes                               | 1.36 (0.91, 2.04)            | 1.13 (0.71, 1.79)               |

\*All models adjusted for age, race/ethnicity, highest level of education, insurance coverage and perceived health status. Abbreviations: CI=confidence interval; OR=odds ratio; PPC=patient-provider communication; ref=reference group.

**Supplementary Table 3. Sensitivity analysis for colon cancer screening restricted to adults ages 50 to 75 years based on USPSTF guidelines.\***

|                                   | <b>Crude<br/>OR (95% CI)</b> | <b>Adjusted<br/>OR (95% CI)</b> |
|-----------------------------------|------------------------------|---------------------------------|
| <b>Face-to-Face PPC</b>           |                              |                                 |
| Not always (Ref)                  | 1.00                         | 1.00                            |
| Explained so understood           | 1.39 (1.12, 1.71)            | 1.26 (0.99, 1.60)               |
| Spent enough time with you        | 1.27 (1.04, 1.54)            | 1.24 (0.99, 1.56)               |
| Understood what needed to do      | 1.34 (1.09, 1.66)            | 1.27 (1.00, 1.61)               |
| Chance to ask questions           | 1.33 (1.09, 1.62)            | 1.26 (1.01, 1.58)               |
| Addressed feelings                | 1.31 (1.09, 1.58)            | 1.31 (1.05, 1.63)               |
| Involved you in decisions         | 1.37 (1.14, 1.64)            | 1.26 (1.01, 1.55)               |
| Help with Feelings of uncertainty | 1.22 (1.01, 1.47)            | 1.24 (0.99, 1.56)               |
| <b>E-mail PPC</b>                 |                              |                                 |
| No (Ref)                          | 1.00                         | 1.00                            |
| Yes                               | 1.44 (1.03, 2.01)            | 1.31 (0.91, 1.88)               |

\*All adjusted models accounted for age, race/ethnicity, marital status, highest level of education, insurance status and perceived health status unless otherwise stated. Abbreviations: CI=confidence interval; OR=odds ratio; PPC=patient-provider communication; ref=reference group; USPSTF=United States Preventive Services Task Force.
